1 **Exercise-related genes analysis of Mongolian Horse**

2

3 Jing Pan,\* Chimgé Purev,<sup>†</sup> Hongwei Zhao,<sup>‡</sup> Zhipeng Zhang,\* Feng Wang,<sup>§</sup>

4 NASHUNWENDOULE,\*\* Guichun Qi,<sup>††</sup> and Huanmin Zhou\*,<sup>1</sup>

5

6

7 \*College of Life Sciences, Inner Mongolia Agricultural University, Huhehot, China

8 <sup>†</sup>Mongolia-China Joint Laboratory of Applied Molecular Biology, “Administration of  
9 the Science Park” CSTI, Ulaanbaatar, Mongolia

10 <sup>‡</sup>Beijing 8omics Gene Technology Co.Ltd, Beijing, China

11 <sup>§</sup>College of Life Sciences, Nankai University, Tianjin, China

12 \*\*Animal Husbandry Workstation of Ewenki Autonomous County, Hulun Buir, China

13 <sup>††</sup>Bayanta Village of Animal Husbandry and Veterinary Station of Ewenki  
14 Autonomous County, Hulun Buir, China

15

16

17 **Exercise-related genes analysis of Mongolian Horse - Abaga horse and Wushen**  
18 **horse**

19

20 **Keywords:** genome, Mongolian horse, Abaga horse, Wushen horse, exercise

21

22 <sup>1</sup>Corresponding author: College of Life Sciences, Inner Mongolia Agricultural

23 University, No. 306 Zhaowuda Road, Hohhot, China. E-mail:

24 [zhouhuanminim@163.com](mailto:zhouhuanminim@163.com). Phone number: +86 13684718744

25

26

27 **ABSTRACT**

28 The Mongolian horses, as a neglected scientific resource, have excellent endurance  
29 and stress resistance to adapt to the cold and harsh plateau conditions. Intraspecific  
30 genetic diversity is mainly embodied in various genetic advantages of different  
31 branches of Mongolian horse. Abaga horse is better than Wushen horse in running  
32 speed, for example. Because people pay progressively attention to the athletic  
33 performance of horse, such as horse racing in Mongolia's Naadam festival, we expect  
34 to guide the exercise-oriented breeding of horses through genomics research. We  
35 obtained the clean data of 630,535,376,400 bp through the entire genome  
36 second-generation sequencing for the whole blood of 4 Abaga horses and 10 Wushen  
37 horses. Based on the data analysis of single nucleotide polymorphism (SNP), we  
38 severally detected that 479 and 943 positively selected genes, particularly  
39 exercise-related, were mainly enriched on equine chromosome 4 in Abaga horses and  
40 Wushen horses, which implied that the chromosome 4 may be associated with the  
41 evolution of the Mongolian horse and athletic performance. Four hundred and forty  
42 genes of positive selection were enriched in 12 exercise-related pathways and  
43 narrowed in 21 exercise-related genes in Abaga horse, which were distinguished from  
44 Wushen horse. So, we speculated that the Abaga horse may have oriented genes for  
45 the motorial mechanism and 21 exercise-related genes also provided molecular  
46 genetic basis for exercise-directed breeding of Mongolian horse.

47 **INTRODUCTION**

48 As an ancient breed, Mongolian horse has gone through a long breeding period (China

49 National Commission of Animal Genetic Resources 2011). With a view to research  
50 tendentiousness, researchers pay more attention to traits of Thoroughbred horse (Gim  
51 *et al.* 2004; Park *et al.* 2012; Capomaccio *et al.* 2013) and Quarter horse (Doan *et al.*  
52 2012; Meira *et al.* 2014), but not the Mongolian horse and its diverse sub-branch. The  
53 preminent endurance and stress-resistance of Mongolia horse are important factors  
54 for it to well adapt to the cold and harsh plateau environment (Li *et al.* 2009). Natural  
55 factors may have enormous impacts on evolution owing to the rough domestication of  
56 Mongolian horse (Hund 2008). Due to various geographic conditions and human  
57 necessities, Mongolian horse gradually formed several specific traits. Some horses  
58 which adapt to the desert climate have larger feet, for instance, some horses which  
59 adjust to mountain road with rocks have supple body and hard hoof; in addition, the  
60 features of horse which accommodate to the grassland climate are tall physique and  
61 good at running (Elisabeth 2011). Living in the Xilin Gol grassland of Inner Mongolia,  
62 Abaga horse belongs to the steppe horse and speeds up to 1600 meters every 91.47  
63 seconds (China National Commission of Animal Genetic Resources 2011). Wushen  
64 horse, which is small build and has broad-flat horseshoe, as symbol of the desert horse  
65 in the south of Maowusu desert of Ordos City in Inner Mongolia, can hoof steadily in  
66 the desert, albeit noffast running speed of 13 to 15 kilometers per hour (Dugarjaviin  
67 2009).

68 In Mongolia, the herdsmen depend on horses by reason that they are the  
69 indispensable sources of pastoral rations, such as meat and dairy products, and used to  
70 be one of the means of transport by herders (Hund 2008). Furthermore, Mongolian

71 horse was an essential and distinguished war-horse in history (Article: The Horse in  
72 Mongolian Culture 2018). For the Naadam of traditional festivals in Mongolia, horse  
73 racing is one of the entertaining activities for herds and regarded as the second most  
74 popular sporting events after wrestling (Davis 2010). So, the running speed of  
75 Mongolian horses has been one of the focuses of attention. Despite not the fastest  
76 horse in the world, people still endeavor to improve running speed of the Mongolian  
77 horse through unremitting consideration and breeding.

78 In order to discuss the genetic variation between Abaga horse and Wushen horse  
79 in Mongolian horse strains, we planned to analyze data of the entire genome with  
80 second-generation sequencing technology to seek out exercise-related single  
81 nucleotide polymorphism (SNP) locus of Mongolian horse and offer a reference for  
82 identification and improvement of Mongolian horse varieties.

## 83 **MATERIALS AND METHODS**

### 84 **Experimental animals and sample preparation**

85 We collected jugular blood of 4 Abaga horses in the Inner Mongolia Abaga County  
86 and 10 Wushen horses in the Inner Mongolia Ordos City Wushen County. Adhering to  
87 the manufacturer's instructions for the extraction of DNA from the whole blood,  
88 genome was extracted by the AxyPrep blood genomic DNA kit. Then we used the  
89 NanoDrop™ 1000 spectrophotometer and polyacrylamide gel electrophoresis to  
90 detect the concentration and integrity of the genome. The concentration of extracted  
91 DNA was between 26.4 ng/μL and 34.4 ng/μL for subsequent library construction.

### 92 **Library preparation and whole-genome sequencing**

93 A TruSeq DNA Sample Prep Kit was used to construct a sequencing library.  
94 Whole-genome sequencing of the horses was performed using the Illumina HiSeq X  
95 <sup>TM</sup> Ten Sequencing System.

#### 96 **Data quality control and comparison to reference genome**

97 The raw data of 639,723,611,100 bp was sequenced from 14 samples. The inferior  
98 quality reads which have sequencing adapter, higher than 10% of N (base of  
99 uncertainty) content or inferior mass base ( $Q \leq 5$ ) content of higher than 50% were  
100 filtered out by in-house Perl/Python scripts to achieve clean data of 630,535,376,400  
101 bp. The Q20, Q30, error rate, GC content and other information of these data were  
102 counted by in-house Perl/Python scripts (Table 1). The sequencing reads were mapped  
103 to reference genomes (Ensembl release 82) by BWA-mem (bwa-0.7.8) (Li 2013),  
104 which PCR and optical repetition of results were removed by using Picard (Broad  
105 Institute 2018). Statistics of mapping rate, average depth and coverage of the data  
106 after comparison were computed by in-house Perl/Python scripts (Table 2).

#### 107 **Single nucleotide polymorphism calling and annotation**

108 SNP calling was performed using the GATK HaplotypeCaller (v3.5) (McKenna *et al.*  
109 2010). In order to evaluate the reliability of the detected SNP sites and filter inferior  
110 quality SNP, we used SAMTools for SNP detection (Li 2011). Simultaneously, the  
111 dbSNP database 5,019,393 SNPs and 670K chip site information were downloaded.  
112 The data was used as training set, and the detected SNPs were evaluated and filtered  
113 by using the GATK VQSR process. The standard for the retention of the final site is  
114 the tranche value of 99 ( $T_i / T_v = 2.02$ ). Finally, the SNPs of equine population were

115 filtered:  $GQ > 10$ ,  $MAF > 0.05$ ,  $call\ rate > 0.9$  (Figure 1). The variants after filtering  
116 were annotated by ANNOVAR (v2016-02-01) (Wang *et al.* 2010) (Table 3).

### 117 **Selective sweep analysis**

118 To identify potential selective sweeps between Abaga horse (fast) and Wushen horse  
119 (slow),  $Pi\ log_2(slow/fast)$  and  $F_{ST}$  was calculated together using VCFtools with a  
120 20kb sliding window and a step size of 10 kb. Windows that contained less than 10  
121 SNPs were excluded from further analysis. The windows that were simultaneously 1)  
122 in the top 5% of Z-transformed  $F_{ST}$  values and 2) in the bottom 5%  $Pi\ log_2(slow/fast)$   
123 were considered to be candidate selective regions in Abaga horse (Figure 2A; Table  
124 S1 <https://doi.org/10.6084/m9.figshare.6289523.v1>). The same applies to Wushen  
125 horse (Figure 2B; Table S2 <https://doi.org/10.6084/m9.figshare.6289532.v1>).

### 126 **Statistic and advanced analysis of positively selected and candidate genes**

127 We annotated the positively selected genes via GO (GOseq) to further screen out the  
128 major enriched functions (Young *et al.* 2010). The pathways which included these  
129 selected genes were enriched by KEGG (KOBAS) (Xie *et al.* 2011). Many positively  
130 selected genes which are in Abaga horse were analyzed further without overlapped  
131 genes between Abaga horse and Wushen horse.

## 132 **RESULTS AND DISCUSSION**

### 133 **Related-clean data stated**

134 We performed the entire genome second-generation sequencing for the whole blood  
135 of four Abaga horses (Figure 3A) and ten Wushen horses (Figure 3B) with the  
136 Illumina HiSeqX ten sequencing platform. The clean data of 630,535,376,400 bp

137 (effective rate of data: 98.56%, error rate of data: 0.03%, mean of Q20: 94.95% and  
138 mean of Q30: 89.80%) was sequenced by filtration and 41.95G as the mean of clean  
139 data was generated in each sample (Table 1). Then, the data was mapped to the  
140 reference genome (Ensembl release 82) via BWAmem (Li 2013). Without PCR and  
141 optical repetition, the successful mapping rate of data was 98.36%. For 14 samples,  
142 the average sequencing depth was 16.75× coverage and average cover degree was  
143 99.55% on reference sequences (Table 2).

#### 144 **Distribution of positive selection genes on chromosomes**

145 Based on the data of SNP following SNP calling (Figure 1), we obtained the genes of  
146 significantly genetic differences by using F-statistics between Abaga horses and  
147 Wushen horses, and narrowed the above genes down to 479 and 943 positively  
148 selected genes combined with SNP polymorphism analysis in Abaga horses and  
149 Wushen horses, respectively (Figure 2A, B; Table S1, S2). We discovered that these  
150 selected genes were mainly distributed on chromosome 4, 7 and 10 in Abaga horses,  
151 and chromosome 1, 4, 8 and 16 in Wushen horses with the analysis of genes  
152 distribution on chromosome (Figure 4).

153 Many genes of the positively selected 479 and 943 genes were enriched on  
154 chromosome 4, and the enrichment quantity of positively selected genes was  
155 secondary by the chromosome enrichment analysis both in Abaga horse and Wushen  
156 horse. In the statement of Schröder (Schröder *et al.* 2011), athletic  
157 performance-related genes were significantly enriched on chromosomes 4 and 12 of  
158 horses, which coincided with the different traits of running speed in our exploring



159 direction. Possibly, we will take equine chromosome 4 as the exercise-related  
160 emphasis of scientific research.

### 161 **Gene Ontology, KEGG pathways and exercise-related genes**

162 Above these positively selected genes were functional annotation by Gene Ontology  
163 (GO). The selected 479 genes of Abaga horse were mainly enriched in neuron part  
164 (GO:0097458), neuron projection (GO:0043005), regulation of membrane potential  
165 (GO:0045838), positive regulation of cell projection organization (GO:0031346),  
166 neuron-neuron synaptic transmission (GO:0007270), synaptic transmission,  
167 glutamatergic (GO:0035249), neurotransmitter secretion (GO:0007269), antigen  
168 processing and presentation (GO:0019882), telencephalon cell migration  
169 (GO:0022029) and forebrain cell migration (GO:0021885). The selected 943 genes of  
170 Wushen horse were mainly enriched in membrane part (GO:0044425), intrinsic  
171 component of membrane (GO:0031224), integral component of membrane  
172 (GO:0016021), cell projection (GO:0042995), neuron part (GO:0097458), neuron  
173 projection (GO:0043005), synapse (GO:0045202), cilium (GO:0005929) and cell  
174 projection assembly (GO:0030031) (Figure 5A, B).

175 The athletic ability of the horse may be influenced not only by physiology, but  
176 also thought and motive. According to the previous studies, equine exercise-related  
177 genes included *DRD1-5*, *SLC6A4* and *BDNF*, the three genes functions were related  
178 to many neurological processes, involving motivation, pleasure, cognition, memory,  
179 learning, fine motor control, modulation of neuroendocrine signaling, adaptive ability  
180 of controlling emotions, supporting the survival of existing neurons, encouraging the

181 growth and differentiation of new neurons and synapses (Momozawa *et al.* 2005;  
182 Bryan *et al.* 2007; Kulikova *et al.* 2007; Lippi *et al.* 2010). The GO analysis results of  
183 Abaga horse were also preferentially enriched in neuronal composition,  
184 neurotransmission and brain cell migration. These genes may allow Abaga horse to  
185 quickly observe and distinguish the surrounding during moving with high-speed,  
186 timely rectify status to respond to the various circumstances.

187 By pathways enrichment analysis of Kyoto Encyclopedia of Genes and Genomes  
188 (KEGG) with the positively selected 479 genes in Abaga horse and 943 genes in  
189 Wushen horse, the enriched pathways ( $P \leq 0.05$ ) of Abaga horse included Propanoate  
190 metabolism, Viral myocarditis, Phototransduction, PI3K-Akt signaling pathway,  
191 Glycerolipid metabolism, Morphine addiction and mRNA surveillance pathway in  
192 which the pathway with the largest number of enriched genes (13 genes) was  
193 PI3K-Akt signaling pathway. As intracellular basal signaling pathways, PI3K-Akt  
194 signaling pathway involves lots of vital movement, such as exercise-induced  
195 physiologic hypertrophy (Shioi *et al.* 2002; Luo *et al.* 2005; Sagara *et al.* 2012; Song  
196 *et al.* 2015) and protecting mitochondria of skeletal muscle by aerobic endurance  
197 training (Liu *et al.* 2016), further explaining the excellent athletic performance of  
198 Abaga horse. Besides that, the enriched pathways ( $P \leq 0.05$ ) of Wushen horse  
199 contained Base excision repair, Glutamatergic synapse, Endometrial cancer,  
200 Glycolysis / Gluconeogenesis, Propanoate metabolism and ABC transporters (Figure  
201 6A, B).

202 Further on SNPs, we analyzed functions of 440 genes of Abaga horse without 39

203 overlapped genes of positively selected genes between Abaga horse and Wushen  
204 horse. We focused on the enriched exercise-related pathways which referred to  
205 Metabolic pathways (Hill *et al.* 2010), Ras signaling pathway (Shioi *et al.* 2002; Xie  
206 *et al.* 2007), PI3K-Akt signaling pathway (Shioi *et al.* 2002; Luo *et al.* 2005; Sagara  
207 *et al.* 2012; Standard *et al.* 2014; Song *et al.* 2015; Liu *et al.* 2016; Vega *et al.* 2017),  
208 MAPK signaling pathway (Schröder *et al.* 2011), Hippo signaling pathway (Gabriel *et*  
209 *al.* 2016), Valine, leucine and isoleucine degradation (McGivney *et al.* 2010), Cardiac  
210 muscle contraction (Do *et al.* 2015), NF-kappa B signaling pathway (Kramer and  
211 Goodyear 2007), Arachidonic acid metabolism (Hill *et al.* 2010), Regulation of actin  
212 cytoskeleton (Hill *et al.* 2010; Schröder *et al.* 2011), Insulin signaling pathway (Gim  
213 *et al.* 2004; Hill *et al.* 2010) and Fatty acid metabolism (Gim *et al.* 2004; Hill *et al.*  
214 2010) in the 440 positively selected genes of Abaga horse that distinguished from  
215 Wushen horse (Figure 7). These enriched pathways comprised some recurrent genes  
216 (Figure 7). Taking repeated genes as pivots, we speculated that the synergistic effect  
217 of pathways enabled faster running speed of Abaga horse compared with Wushen  
218 horse. But, in our studying, the enriched genes of positive selection were different  
219 from the previous studied genes in the above exercise-related pathways (Table 4),  
220 which indicated species-specific genes of positive selection in Abaga horse compared  
221 with other species (human, rat, mouse, leopard, thoroughbred horse etc.).

222 According to the analysis of GO, KEGG and individual gene function, we  
223 subsequently put our interest in exercise-related genes of Abaga horse. Twenty-one  
224 genes may involve in exercise of Abaga horse while their functions embodied

225 vasoconstriction (*HTR2B*) (Launay *et al.* 2002; Bevilacqua *et al.* 2010; Meira *et al.*  
226 2014), angiogenesis (*CDH5*) (Sauteur *et al.* 2014), cardiac contraction (*KCNQ1*)  
227 (Jespersen *et al.* 2005; Brown *et al.* 2015; Pedersen *et al.* 2017), cardiac development  
228 and muscle structure (*ENAH*) (Franzini-Armstrong 1973; Benz *et al.* 2013), muscle  
229 growth (*PIH1D1*, *SMURF1*) (Inoue *et al.* 2010; Ponsuksili *et al.* 2014; Dalbo *et al.*  
230 2013), myogenic differentiation (*UNC13C*) (Meyer *et al.* 2015; Langlois and Cowan  
231 2017), skeletal muscle function (*ATPIA3*) (Aughey *et al.* 2007; Brashear *et al.* 2007),  
232 femur strength and bone mineral density (*PPP2R5B*, *PPP6R3*) (Alam *et al.* 2009;  
233 Medina-Gomez *et al.* 2017), osteoclast growth (*PTPRE*, *RHOBTB1*) ( Chiusaroli *et al.*  
234 2004; Song *et al.* 2014), chondrogenesis (SCFD) (DeLise *et al.* 2000; Hou *et al.* 2017),  
235 lipid and carbohydrate metabolism (*PPARD*, *GCG*, *TCF7L2*, *GALNT13*) (Yi *et al.*  
236 2005; Bevilacqua *et al.* 2010; Park *et al.* 2012; Ahmetov and Fedotovskaya 2015;  
237 Giordano Attianese and Desvergne 2015; Ropka-Molik *et al.* 2017), exercise  
238 stress-induced response (*CD69*, *EIF4G3*) (Testi *et al.* 1989; Gradi *et al.* 1998;  
239 Cappelli *et al.* 2007; Morabito *et al.* 2016), exercise coordination (*GRM1*) (Conquet *et*  
240 *al.* 1994; Bossi *et al.* 2017) and height (*VGLLA*) (Gabriel *et al.* 2016). These genes of  
241 positive selection were presented simultaneously in Abaga horse, which may be a  
242 reason that it runs rapider than Wushen horse.

243 Counting on exercise-related genes of previous studies, the equine athletic  
244 performance is related to glucose metabolism, stress immune response, angiogenesis  
245 and muscle supply, insulin signal transduction, fat substrate application, muscle  
246 strength and the formation of bones and cartilage with growth (Gim *et al.* 2004; Hill

247 *et al.* 2010; Park *et al.* 2012; Capomaccio *et al.* 2013; Kamm *et al.* 2013). We picked  
248 up exercise-related genes as candidate genes in positively selected genes, further,  
249 presented enriched KEGG pathways and functions with selected exercise-related  
250 genes (Figure 7). *HTR2B* (encoding 5-hydroxytryptamine receptor 2B), has been  
251 identified in the genome of Quarter horses of the racing line (Meira *et al.* 2014) and  
252 associated with impulsive behavior (Bevilacqua *et al.* 2010) and vasoconstriction  
253 (Launay *et al.* 2002). In zebrafish, vascular endothelial cadherin (encoded by *CDH5*)  
254 can promote elongation of the endothelial cell interface during angiogenesis (Sauteur  
255 *et al.* 2014). *KCNQ1* (encoding KvLQT1, a potassium channel protein) is related to  
256 exercise, and mutation of *KCNQ1* and *KCNE1* can casus susceptibility of sudden  
257 cardiac death (SCD) for horse (Jespersen *et al.* 2005; Brown *et al.* 2015; Pedersen *et*  
258 *al.* 2017). Mena (encoded by *ENAH*) which located in Z line that the borders of the  
259 sarcomere, VASP, and  $\alpha$ II-Spectrin assemble cardiac multi-protein complexes to  
260 regulate cytoplasmic actin networks (Franzini-Armstrong 1973; Benz *et al.* 2013).  
261 *PIH1D1* (encoding the components of the apoptotic regulatory complex R2TP) is  
262 relevant to muscle mass (Inoue *et al.* 2010; Ponsuksili *et al.* 2014). Because E3  
263 ubiquitin-protein ligase SMURF1 (encoded by *SMURF1*) function as negative  
264 regulators of myostatin pathway activity and myostatin is negative regulator of  
265 skeletal muscle mass, up-regulated expression of *SMURF1* may link to skeletal  
266 muscle growth following prolonged training (Dalbo *et al.* 2013). *UNC13C* is  
267 connected with differentiation of myoblast while integral myotubes originate in  
268 myoblast differentiation and raise the distinct muscle fiber types to build the complex

269 skeletal muscle architecture for body movement, postural behavior and breathing  
270 (Meyer *et al.* 2015; Langlois and Cowan 2017). *ATPIA3* encodes subunit alpha-3 of  
271 sodium/potassium-transporting ATPase, which increased expression may be  
272 conducive to decrease fatigue after training (Brashear *et al.* 2007; Aughey *et al.* 2007).  
273 *PPARD* (encoding peroxisome proliferator-activated receptor delta) participate in  
274 regulation of energy metabolism, cell proliferation and differentiation, protection in  
275 stress conditions such as oxidative stress and inflammation and other important life  
276 activities (Giordano Attianese and Desvergne 2015). The antecedent studies have  
277 shown that Arabian horse will change the expression of *PPARD* and other genes of  
278 PPAR signaling pathway genes in skeletal muscle during exercise, and improve  
279 coefficient of utilization of fatty acids by energy conversion (Ropka-Molik *et al.*  
280 2017). The up-regulated *PPARD* are also found after exercise in Thoroughbred horse  
281 (Park KD *et al.* 2012). So, we speculated that positively selected *PPARD* improved  
282 athletic ability by a similar mechanism in Abaga horse. Besides counter-regulatory  
283 hormone of insulin, *GCG* (encoding glucagon) is deemed to be involved in adipose  
284 metabolism and energy balance (Bevilacqua *et al.* 2010). Transcription factor 7-like 2  
285 (encoded by *TCF7L2*) not only affects the metabolism of adipocytes by DNA  
286 methylation, but also activates the corresponding target genes through the Wnt  
287 signaling pathway to specifically inhibit glucagon synthesis in enteroendocrine cells  
288 (Yi *et al.* 2005). *GALNT13* may be involved in metabolic and energy pathways  
289 (Ahmetov and Fedotovskaya 2015).

290 Exercise has a great influence on the composition of the developing horse joints,

291 the thickness of the hyaline cartilage of the adult horse, the calcified cartilage and  
292 subchondral bone (van de Lest *et al.* 2002; Tranquille *et al.* 2009). We found several  
293 genes associated with skeleton and cartilage development among candidate genes of  
294 Abaga horse. *PPP2R5B* and *PPP6R3* are closely related to femur strength in rats and  
295 bone mineral density in humans, respectively (Alam *et al.* 2009; Medina-Gomez *et al.*  
296 2017). *PTPRE* encodes receptor-type tyrosine-protein phosphatase epsilon which is a  
297 positive regulator of osteoclast function (Chiusaroli *et al.* 2004). *RHOBTBI* is  
298 involved in osteoclast-mediated bone absorption activity (Song *et al.* 2014).  
299 Chondrogenesis demands transformation of chondrocytes from a simple mesenchymal  
300 condensation to cells with a highly enriched extracellular matrix (ECM) in the  
301 developing skeleton in which *SCFD1* plays an important role in the secretion of ECM  
302 protein during chondrogenesis (DeLise *et al.* 2000; Hou *et al.* 2017). So far there are  
303 no studies of association between these genes and the motor function of horses, but  
304 these skeleton- and cartilage-related genes provide new inspiration into the  
305 correlational research between ossature and exercise.

306 After exercise, the equine stress reaction will involve inflammation, cell  
307 signaling, and immune interactions (Capomaccio *et al.* 2013). Cell activation is the  
308 first step in the proliferation of immune cells, and CD69 is firstly detected in cell  
309 surface glycoproteins after activation (Testi *et al.* 1989). The low- to  
310 moderate-intensity aerobic trekking induces activation of CD69 T cell and promotes  
311 anti-stress effects on the oxidative balance and the high-altitude-induced injury of the  
312 immune responses among women (Morabito *et al.* 2016). *EIF4G3* encodes eukaryotic

313 translation initiation factor 4 gamma 3 which is indispensable for triggering protein  
314 synthesis and is thought to be involved in exercise stress-induced response in horses  
315 (Gradi *et al.* 1998; Cappelli *et al.* 2007). We hypothesized that these genes may be  
316 involved in the ability of Abaga horses to enhance certain diseases resistance through  
317 exercise, but more data and experiments are needed to verify.

318 *GRM1* encodes metabotropic glutamate receptor 1, which deficiency can lead to  
319 serious deficits of motor coordination and spatial learning in mice (Conquet *et al.*  
320 1994; Bossi *et al.* 2017). The effectors of Hippo signal pathway regulate several  
321 motor-related genes and adaptations while *VGLL4* is Hippo-signal-related to body  
322 height (Gabriel *et al.* 2016). These exercise-related genes were positively selected in  
323 Abaga horse, indicating that Abaga horse has exercise-related genetic potential  
324 compared with Wushen horse.

325 In conclusion, we analyzed the genomic data of Abaga horse and Wushen horse  
326 by sequencing. We uncovered that most of the positively selected genes, particularly  
327 exercise-related, of Abaga horse and Wushen horse were concentrated on  
328 chromosome 4, which implied that the chromosome 4 may be associated with the  
329 evolution of the Mongolian horse, and athletic performance may be the future  
330 research direction. The positively selected genes of Abaga horse were enriched in  
331 exercise-related pathways that were different from some selected genes of other  
332 horses or species, suggesting that the Abaga horse may have exclusively physiological  
333 mechanism for the motorial process. Twenty-one exercise-related genes were detected,  
334 which provided molecular genetic basis for further research on athletic performance



335 and breeding of Mongolian horse.

### 336 ACKNOWLEDGMENTS

337 We thank Y.R. Zhang, K.F. Wu, S.Y. Wang, Z.Z. Liu, W. Wei, P.W. Shi and C.H. Cao

338 for sampling assistance.

### 339 FIGURE LEGENDS

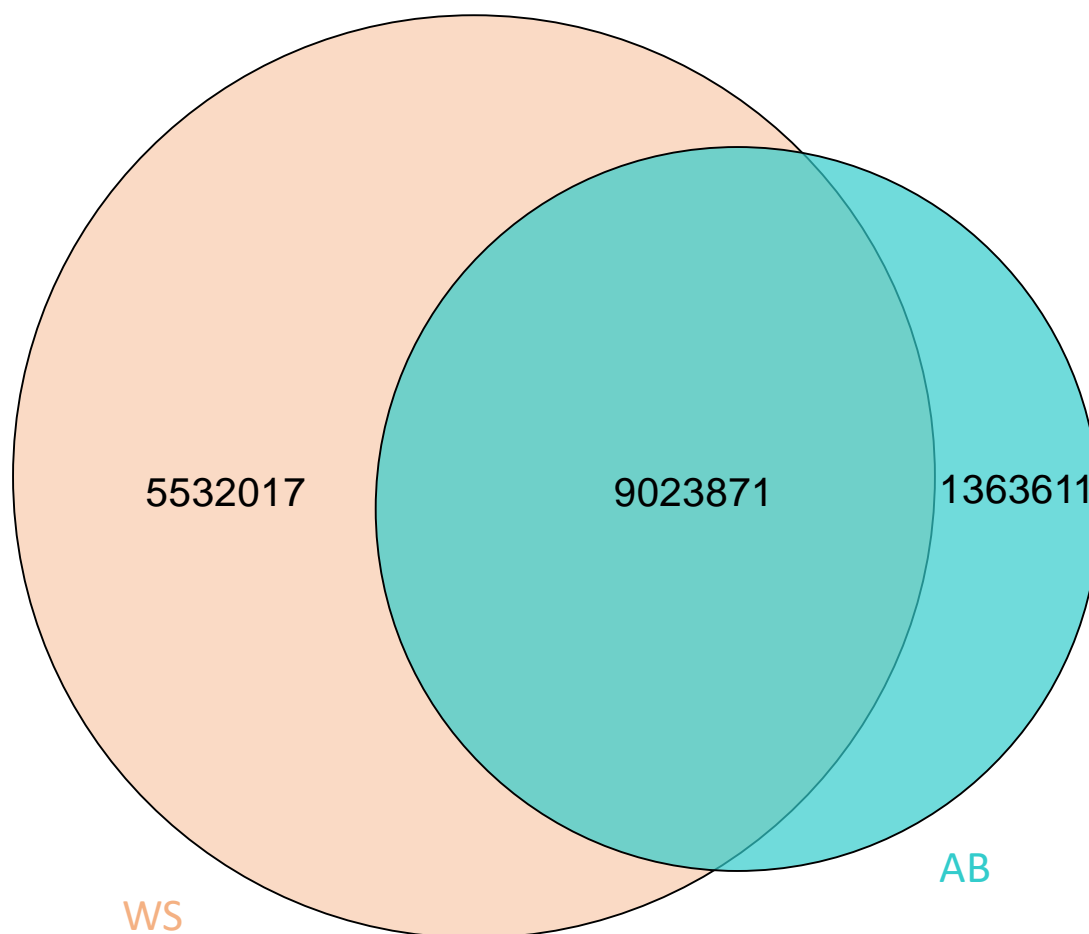

340

341 **Figure 1** SNP following SNP calling. High quality SNPs were evaluated and indentified. AB, WS

342 indicated Abaga horse and Wushen horse, respectively.

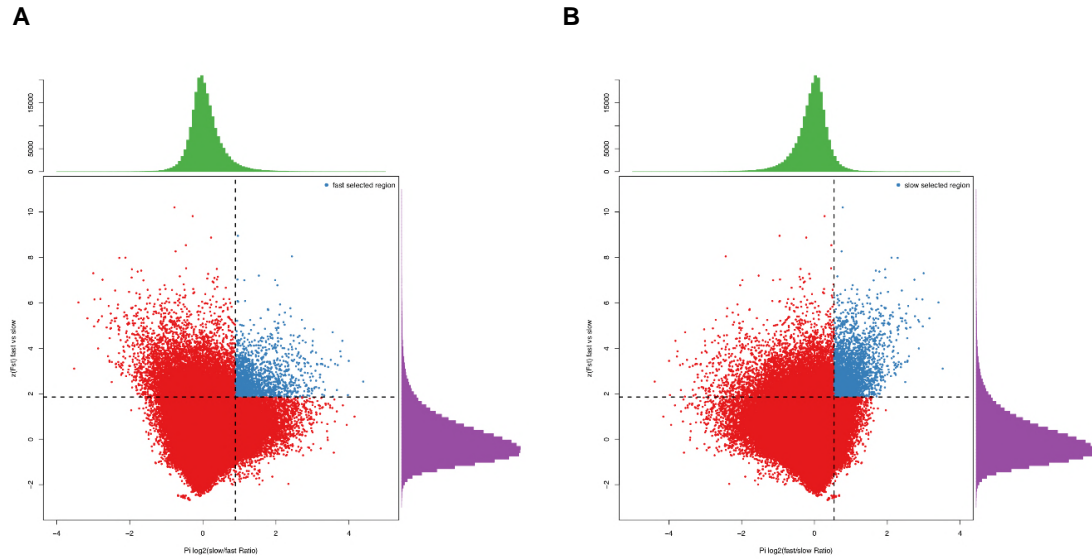

343

344 **Figure 2** Identification of selected regions in Abaga horse and Wushen horse. To identify potential

345 selective sweeps between Abaga horse (fast) and Wushen horse (slow),  $\log_2(\pi_{\text{slow}}/\pi_{\text{fast}})$  and  $F_{ST}$  was

346 calculated together using VCFtools with a 20kb sliding window and a step size of 10 kb. Windows that

347 contained less than 10 SNPs were excluded from further analysis. The windows that were

348 simultaneously 1) in the top 5% of Z-transformed  $F_{ST}$  values and 2) in the bottom 5%

349  $\log_2(\pi_{\text{fast}}/\pi_{\text{slow}})$  were considered to be candidate selective regions in (A) Abaga horse and (B)

350 Wushen horse.

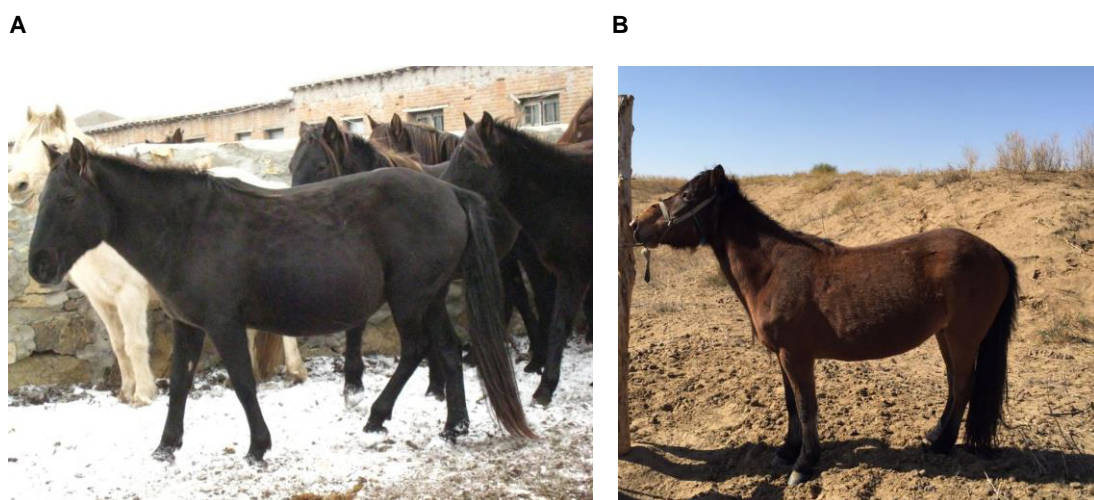

351

352 **Figure 3** Actual Photos of Mongolian horses, (A) Abaga horse and (B) Wushen horse.

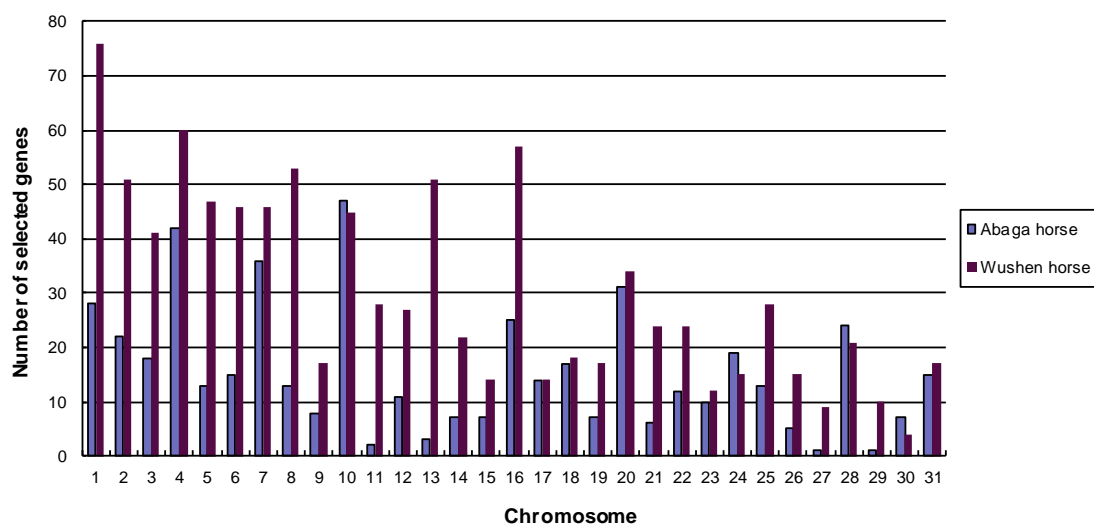

353

354 **Figure 4** Distribution of selected genes on chromosomes.

A

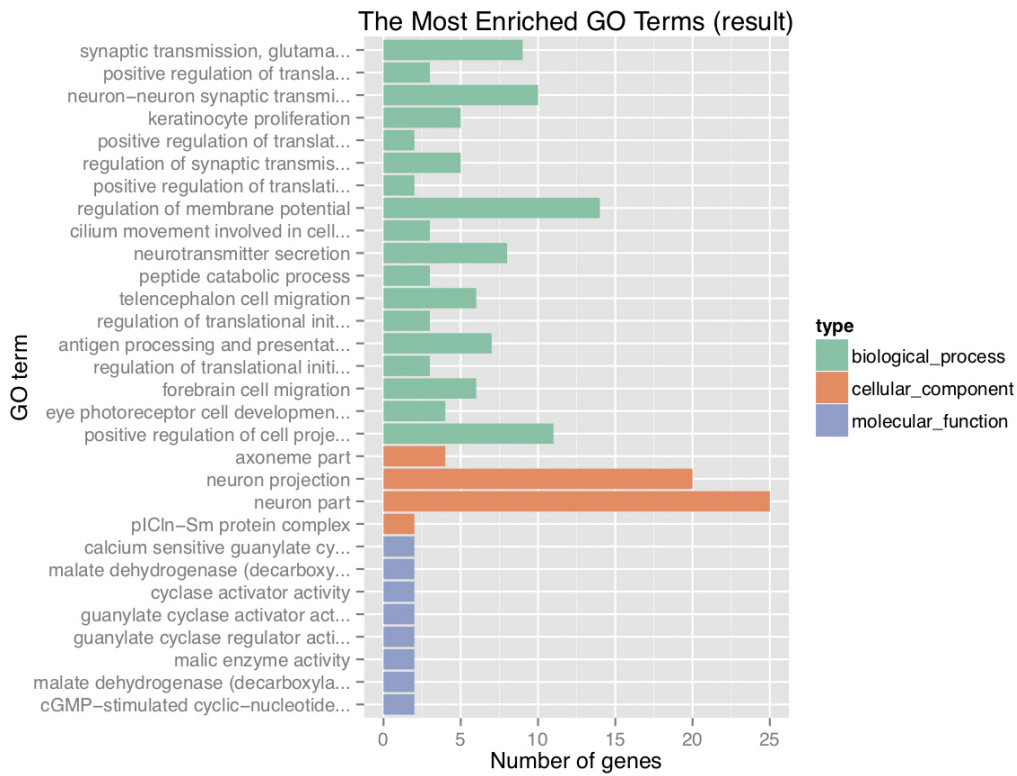

B

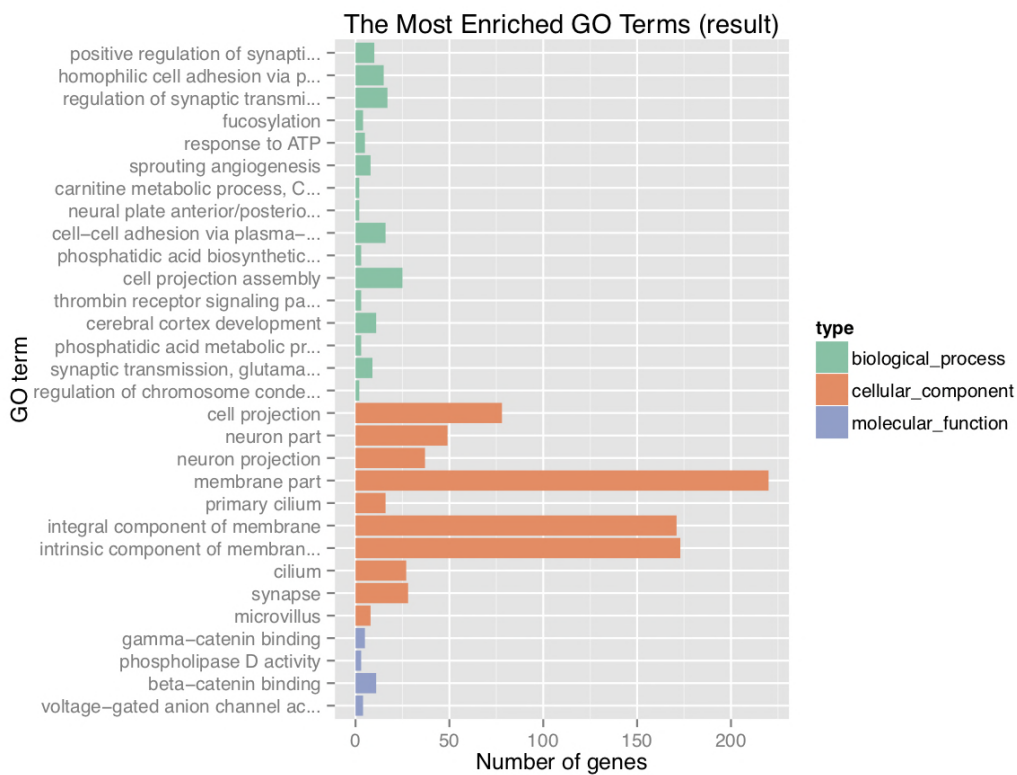

355

356 **Figure 5** Function analysis based on Gene Ontology. The most enriched GO terms in (A) Abaga horse

357 and (B) Wushen horse.

A

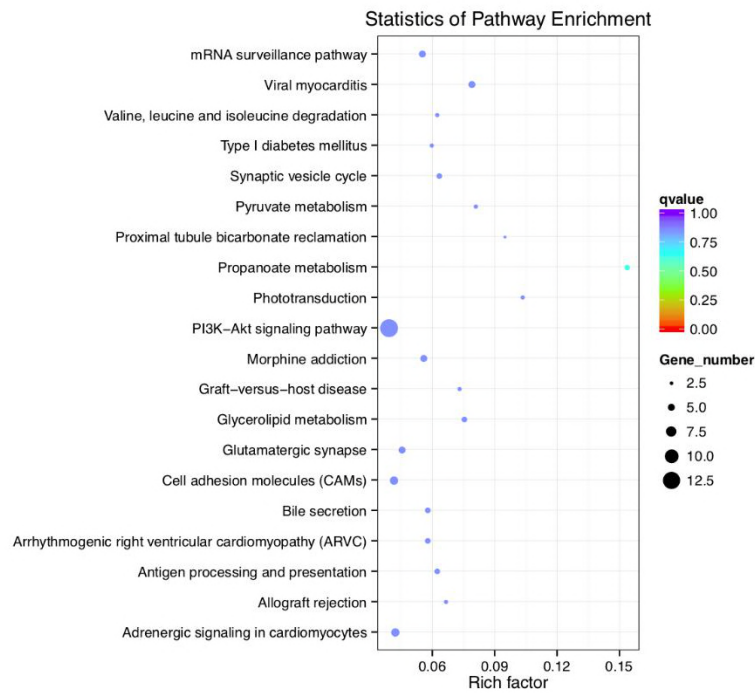

B

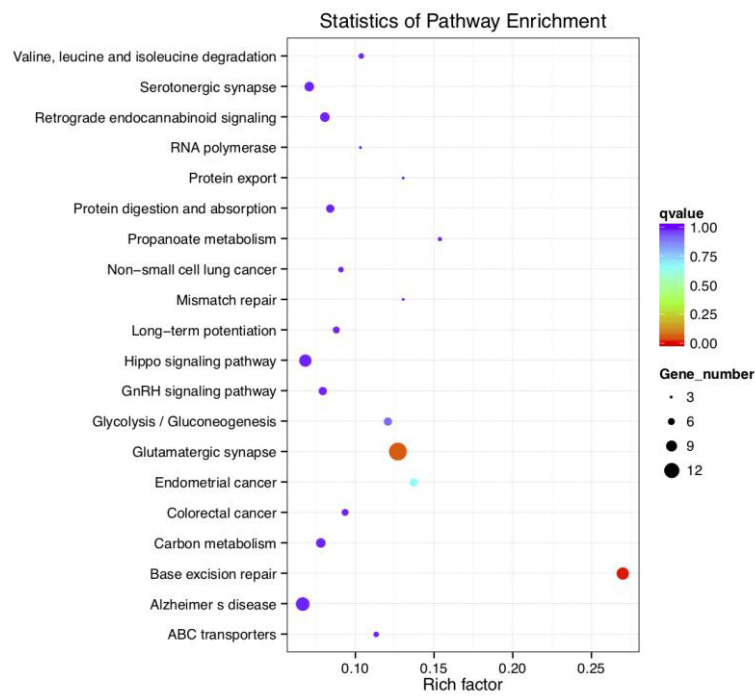

358

359 **Figure 6** The KEGG pathway enrichment analysis. Top 20 of enriched pathways by statistics in (A)

360 Abaga horse and (B) Wushen horse.

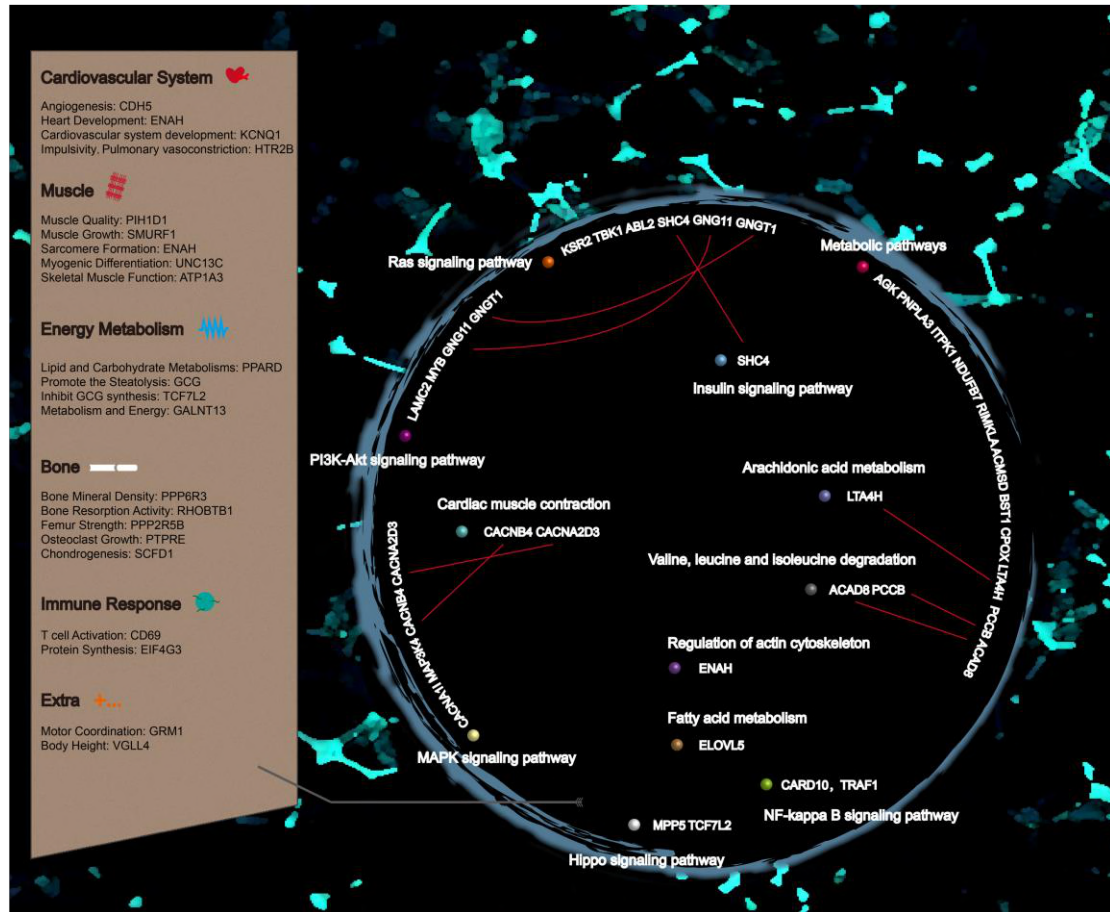

361

362 **Figure 7** The exercise-related candidate genes and pathways of Abaga horse.

363 **Tables**

364

**Table 1** Data volume and quality

| Sample  | Sample Type  | RawData         | CleanData       | EffectiveRat | ErrorRate | Q20   | Q30   | GC Content |
|---------|--------------|-----------------|-----------------|--------------|-----------|-------|-------|------------|
| AB01    | Abaga Horse  | 48,216,007,500  | 47,152,467,900  | 97.79        | 0.03      | 96.21 | 92.24 | 42.89      |
| AB02    | Abaga Horse  | 43,047,445,800  | 42,340,444,800  | 98.36        | 0.03      | 96.17 | 92.1  | 42.65      |
| AB03    | Abaga Horse  | 47,273,694,300  | 46,714,855,800  | 98.82        | 0.03      | 95.76 | 91.36 | 42.55      |
| AB04    | Abaga Horse  | 48,416,284,200  | 47,906,212,800  | 98.95        | 0.03      | 95.96 | 91.47 | 42.13      |
| WS01    | Wushen Horse | 49,415,626,200  | 48,784,894,800  | 98.72        | 0.03      | 95.69 | 91.23 | 41.97      |
| WS02    | Wushen Horse | 53,074,008,900  | 52,417,962,000  | 98.76        | 0.03      | 96.09 | 92.19 | 42.35      |
| WS03    | Wushen Horse | 45,358,642,200  | 44,789,835,900  | 98.75        | 0.03      | 95.87 | 91.47 | 41.97      |
| WS04    | Wushen Horse | 47,681,665,800  | 47,139,254,400  | 98.86        | 0.03      | 95.94 | 91.6  | 41.66      |
| WS05    | Wushen Horse | 50,647,742,700  | 50,012,300,700  | 98.75        | 0.03      | 95.86 | 91.47 | 41.84      |
| WS06    | Wushen Horse | 45,072,226,800  | 44,633,740,200  | 99.03        | 0.03      | 95.79 | 91.61 | 42.19      |
| WS07    | Wushen Horse | 34,681,049,100  | 34,040,596,500  | 98.15        | 0.05      | 92.2  | 84.65 | 43.07      |
| WS08    | Wushen Horse | 45,212,322,600  | 44,350,535,700  | 98.09        | 0.04      | 92.41 | 84.97 | 43.02      |
| WS09    | Wushen Horse | 44,382,563,100  | 43,593,247,800  | 98.22        | 0.04      | 92.47 | 85.07 | 43.23      |
| WS10    | Wushen Horse | 37,244,331,900  | 36,659,027,100  | 98.43        | 0.04      | 92.91 | 85.77 | 43.12      |
| Average |              | 45,694,543,650  | 45,038,241,171  |              | 0.03      | 94.95 | 89.80 | 42.47      |
| Total   |              | 639,723,611,100 | 630,535,376,400 | 98.56%       |           |       |       |            |

365

366



367

**Table 2** Data comparison

| Sample  | Total Reads | Mapping Rate(%) | Average Depth | Coverage at least 1X(%) | Coverage at least 4X(%) | Coverage at least 10X(%) |
|---------|-------------|-----------------|---------------|-------------------------|-------------------------|--------------------------|
| AB01    | 315216417   | 98.55           | 17.46         | 99.59                   | 99.32                   | 93.57                    |
| AB02    | 282990429   | 98.49           | 15.82         | 99.56                   | 99.24                   | 89.18                    |
| AB03    | 312280472   | 98.49           | 16.93         | 99.52                   | 98.98                   | 90.17                    |
| AB04    | 320340217   | 98.22           | 18.25         | 99.57                   | 99.15                   | 93.1                     |
| WS01    | 326298749   | 98.6            | 17.63         | 99.54                   | 99.25                   | 94.36                    |
| WS02    | 350423462   | 98.41           | 19.65         | 99.57                   | 99.24                   | 94.72                    |
| WS03    | 299507485   | 98.63           | 16.45         | 99.51                   | 99.16                   | 92.2                     |
| WS04    | 315038236   | 98.52           | 17.28         | 99.51                   | 98.98                   | 91.77                    |
| WS05    | 334519623   | 98.65           | 18.19         | 99.54                   | 99.24                   | 95.43                    |
| WS06    | 298331035   | 98.52           | 16.88         | 99.53                   | 99.23                   | 92.89                    |
| WS07    | 227540381   | 97.88           | 12.85         | 99.56                   | 98.73                   | 68.52                    |
| WS08    | 296433759   | 97.97           | 16.75         | 99.61                   | 99.32                   | 90.53                    |
| WS09    | 291390679   | 98              | 16.44         | 99.51                   | 99.18                   | 88.97                    |
| WS10    | 245088985   | 98.13           | 13.85         | 99.6                    | 99.05                   | 76.55                    |
| Average | 301099994.9 | 98.36142857     | 16.745        | 99.55142857             | 99.14785714             | 89.42571429              |

368

369



**Table 3** Single nucleotide polymorphism annotation

| sample | total    | intergenic | upstream          | downstream           | upstream;downstream | UTR                         | intronic               | splicing | exonic  | ncRNA intronic | ncRNA<br>splicing | ncRNA exonic |           |
|--------|----------|------------|-------------------|----------------------|---------------------|-----------------------------|------------------------|----------|---------|----------------|-------------------|--------------|-----------|
| AB01   | 5941934  | 4312213    | 53776             | 48084                | 1290                | 5461                        | 1470340                | 382      | 44314   | 0              | 58                | 6016         |           |
| AB02   | 5980256  | 4328671    | 54333             | 49203                | 1132                | 5508                        | 1489605                | 372      | 45223   | 1              | 57                | 6151         |           |
| AB03   | 5997232  | 4335631    | 54186             | 48901                | 1150                | 5562                        | 1499169                | 370      | 46143   | 1              | 54                | 6065         |           |
| AB04   | 6001989  | 4357097    | 53432             | 49324                | 1155                | 5565                        | 1482717                | 371      | 46136   | 0              | 55                | 6137         |           |
| WS01   | 6064076  | 4396385    | 54982             | 49523                | 1205                | 5500                        | 1504242                | 381      | 45597   | 0              | 58                | 6203         |           |
| WS02   | 6090471  | 4401130    | 55567             | 49597                | 1208                | 5739                        | 1523751                | 398      | 46839   | 0              | 63                | 6179         |           |
| WS03   | 6020664  | 4356630    | 53850             | 48718                | 1233                | 5456                        | 1503968                | 379      | 44501   | 0              | 52                | 5877         |           |
| WS04   | 6085300  | 4412074    | 54616             | 49554                | 1213                | 5585                        | 1509129                | 366      | 46585   | 2              | 57                | 6119         |           |
| WS05   | 6068043  | 4390157    | 54591             | 48846                | 1243                | 5508                        | 1516293                | 385      | 44908   | 2              | 52                | 6058         |           |
| WS06   | 6040564  | 4375737    | 54833             | 49476                | 1233                | 5552                        | 1502532                | 394      | 44718   | 1              | 57                | 6031         |           |
| WS07   | 5768919  | 4180511    | 50791             | 46623                | 1152                | 5073                        | 1436192                | 364      | 42507   | 1              | 54                | 5651         |           |
| WS08   | 6036395  | 4368807    | 53612             | 49117                | 1212                | 5410                        | 1506878                | 378      | 44892   | 1              | 61                | 6027         |           |
| WS09   | 5541660  | 4011569    | 49104             | 45086                | 973                 | 5031                        | 1382618                | 358      | 41503   | 1              | 50                | 5367         |           |
| WS10   | 5952039  | 4316455    | 52643             | 47956                | 1120                | 5423                        | 1478539                | 357      | 43679   | 0              | 48                | 5819         |           |
| sample | stopgain | stoploss   | synonymous<br>SNV | nonsynonymous<br>SNV | non/sys             | Het in exon<br>heterozygous | Het rate in<br>exon(%) | Ts       | Tv      | Ts/Tv          | Het               | Het_rate(%)  | Freq(1kb) |
| AB01   | 188      | 16         | 23564             | 20497                | 0.87                | 28681                       | 0.919                  | 3881220  | 1930876 | 2.01           | 3984470           | 1.641        | 2.446     |
| AB02   | 184      | 10         | 23969             | 21009                | 0.877               | 29228                       | 0.936                  | 3907370  | 1942215 | 2.012          | 4032261           | 1.66         | 2.462     |
| AB03   | 206      | 9          | 24629             | 21248                | 0.863               | 29837                       | 0.956                  | 3918705  | 1947553 | 2.012          | 3964342           | 1.632        | 2.469     |
| AB04   | 182      | 13         | 24558             | 21354                | 0.87                | 30205                       | 0.967                  | 3921646  | 1948790 | 2.012          | 3997852           | 1.646        | 2.471     |
| WS01   | 189      | 16         | 24256             | 21104                | 0.87                | 28987                       | 0.928                  | 3965532  | 1966966 | 2.016          | 4014979           | 1.653        | 2.497     |
| WS02   | 204      | 11         | 24947             | 21670                | 0.869               | 29835                       | 0.956                  | 3978988  | 1978429 | 2.011          | 3948266           | 1.626        | 2.508     |

---

|      |     |    |       |       |       |       |       |         |         |       |         |       |       |
|------|-----|----|-------|-------|-------|-------|-------|---------|---------|-------|---------|-------|-------|
| WS03 | 166 | 11 | 23690 | 20583 | 0.869 | 27712 | 0.888 | 3938680 | 1952297 | 2.017 | 3928887 | 1.618 | 2.479 |
| WS04 | 187 | 13 | 24873 | 21452 | 0.862 | 29601 | 0.948 | 3980030 | 1974155 | 2.016 | 3960924 | 1.631 | 2.506 |
| WS05 | 181 | 11 | 23914 | 20778 | 0.869 | 28242 | 0.905 | 3969915 | 1967229 | 2.018 | 4023060 | 1.656 | 2.498 |
| WS06 | 181 | 12 | 23838 | 20644 | 0.866 | 27812 | 0.891 | 3949609 | 1959971 | 2.015 | 3962792 | 1.632 | 2.487 |
| WS07 | 168 | 13 | 22814 | 19503 | 0.855 | 27110 | 0.868 | 3777434 | 1866307 | 2.024 | 3850010 | 1.585 | 2.375 |
| WS08 | 193 | 13 | 24013 | 20632 | 0.859 | 28452 | 0.911 | 3950543 | 1955509 | 2.02  | 4008283 | 1.65  | 2.485 |
| WS09 | 155 | 10 | 22172 | 19118 | 0.862 | 21714 | 0.696 | 3624488 | 1796797 | 2.017 | 3022587 | 1.244 | 2.282 |
| WS10 | 187 | 14 | 23361 | 20075 | 0.859 | 27460 | 0.88  | 3895339 | 1927308 | 2.021 | 3905744 | 1.608 | 2.451 |

---

371 **Table 4** Comparison of enriched genes in candidate pathways in Abaga horse and previous studies

| KEGG pathway                     | ID       | Selected genes in Abaga horse                                          | Selected genes or proteins in previous studies |
|----------------------------------|----------|------------------------------------------------------------------------|------------------------------------------------|
| Metabolic pathways               | ecb01100 | <i>LTA4H AGK PNPLA3 ITPK1 NDUFB7 RIMKLA PCCB ACAD8 ACMSD BST1 CPOX</i> | <i>CYP51A1</i>                                 |
| Ras signaling pathway            | ecb04014 | <i>SHC4 GNG11 GNGT1 KSR2 TBK1 ABL2</i>                                 | <i>APOA1 IGF-1 HRAS</i>                        |
| PI3K-Akt signaling pathway       | ecb04151 | <i>LAMC2 GNG11 GNGT1 MYB</i>                                           | PGC-1a IGF-1 IGF-1R ErbB2 ErbB4                |
| MAPK signaling pathway           | ecb04010 | <i>CACNA1I CACNA2D3 CACNB4 MAP3K4</i>                                  | ERK AP-1                                       |
| Hippo signaling pathway          | ecb04390 | <i>MPP5 TCF7L2</i>                                                     | <i>WWTR1 LATS2 TEAD YAP1 VGLL2 VGLL3 VGLL4</i> |
| Cardiac muscle contraction       | ecb04260 | <i>CACNA2D3 CACNB4</i>                                                 | <i>CK-M</i>                                    |
| NF-kappa B signaling pathway     | ecb04064 | <i>CARD10 TRAF1</i>                                                    | MnSOD iNOS                                     |
| Arachidonic acid metabolism      | ecb00590 | <i>LTA4H</i>                                                           | <i>PTGS1</i>                                   |
| Regulation of actin cytoskeleton | ecb04810 | <i>ENAH</i>                                                            | <i>GSN BDKRB2 CHRM MYLK ACTN3</i>              |
| Insulin signaling pathway        | ecb04910 | <i>SHC4</i>                                                            | <i>GYS1 PPARGC1A</i>                           |
| Fatty acid metabolism            | ecb01212 | <i>ELOVL5</i>                                                          | <i>ADHFE1 SREBP2</i>                           |

372

373 **SUPPLEMENTAL MATERIALS**

374 **Table S1** The genes of the selective regions in Abaga horse.

375 **Table S2** The genes of the selective regions in Wushen horse.

376

377 **LITERATURE CITED**

378 Ahmetov I.I., Fedotovskaya O.N., 2015. Current Progress in Sports Genomics. Adv  
379 Clin Chem. 70:247-314.

380 Article: The Horse in Mongolian Culture, 2018.  
381 [https://www.amnh.org/explore/science-bulletins/bio/documentaries/the-last-wild-](https://www.amnh.org/explore/science-bulletins/bio/documentaries/the-last-wild-horse-the-return-of-takhi-to-mongolia/article-the-horse-in-mongolian-culture)  
382 [horse-the-return-of-takhi-to-mongolia/article-the-horse-in-mongolian-culture.](https://www.amnh.org/explore/science-bulletins/bio/documentaries/the-last-wild-horse-the-return-of-takhi-to-mongolia/article-the-horse-in-mongolian-culture)  
383 Accessed 10 Jan 2018.

384 Alam I., Sun Q., Koller D.L., Liu L., Liu Y., Edenberg H.J., Li J., Foroud T., Turner  
385 C.H., 2009. Differentially expressed genes strongly correlated with femur  
386 strength in rats. Genomics 94:257-62.

387 Aughey R.J., Murphy K.T., Clark S.A., Garnham A.P., Snow R.J., Cameron-Smith D.,  
388 Hawley J.A., McKenna M.J., 2007. Muscle Na<sup>+</sup>-K<sup>+</sup>-ATPase activity and isoform  
389 adaptations to intense interval exercise and training in well-trained athletes. J  
390 Appl Physiol (1985). 103:39-47.

391 Benz P.M, Merkel C.J, Offner K., Abeßer M., Ullrich M., Fischer T., Bayer B.,  
392 Wagner H., Gambaryan S., Ursitti J.A., Adham I.M., Linke W.A., Feller S.M.,  
393 Fleming I., Renné T., Frantz S., Unger A., Schuh K., 2013. Mena/VASP and  
394  $\alpha$ II-Spectrin complexes regulate cytoplasmic actin networks in cardiomyocytes  
395 and protect from conduction abnormalities and dilated cardiomyopathy. Cell  
396 Commun Signal. 11:56.

397 Bevilacqua L., Doly S., Kaprio J., Yuan Q., Tikkanen R., Paunio T., Zhou Z.,  
398 Wedenoja J., Maroteaux L., Diaz S., Belmer A., Hodgkinson C.A., Dell'osso L.,

399 Suvisaari J., Coccaro E., Rose R.J., Peltonen L., Virkkunen M., Goldman D.,  
400 2010. A population-specific *HTR2B* stop codon predisposes to severe impulsivity.  
401 Nature. 468:1061-6.

402 Bossi S., Musante I., Bonfiglio T., Bonifacino T., Emionite L., Cerminara M.,  
403 Cervetto C., Marcoli M., Bonanno G., Ravazzolo R., Pittaluga A., Puliti A., 2017.  
404 Genetic inactivation of mGlu5 receptor improves motor coordination in the  
405 *Grm1<sup>crv4</sup>* mouse model of SCAR13 ataxia. Neurobiol Dis. 109:44-53.

406 Brashear A., Dobyens W.B., de Carvalho Aguiar P., Borg M., Frijns C.J., Gollamudi S.,  
407 Green A., Guimaraes J., Haake B.C., Klein C., Linazasoro G., Münchau A.,  
408 Raymond D., Riley D., Saunders-Pullman R., Tijssen M.A., Webb D., Zaremba  
409 J., Bressman S.B., Ozelius L.J., 2007. The phenotypic spectrum of rapid-onset  
410 dystonia-parkinsonism (RDP) and mutations in the *ATPIA3* gene. Brain.  
411 130:828-35.

412 Broad Institute. Picard Tools - By Broad Institute.  
413 <http://broadinstitute.github.io/picard>. Accessed 11 Jan 2018.

414 Brown W.M., 2015. Exercise-associated DNA methylation change in skeletal muscle  
415 and the importance of imprinted genes: a bioinformatics meta-analysis. Br J  
416 Sports Med. 49:1567-78.

417 Bryan A., Hutchison K.E., Seals D.R., Allen D.L., 2007. A transdisciplinary model  
418 integrating genetic, physiological, and psychological correlates of voluntary  
419 exercise. Health Psychol. 26:30-9.

420 Capomaccio S., Vitulo N., Verini-Supplizi A., Barcaccia G., Albiero A., D'Angelo M.,

- 421 Campagna D., Valle G., Felicetti M., Silvestrelli M., Cappelli K., 2013. RNA  
422 sequencing of the exercise transcriptome in equine athletes. *PLoS One*.  
423 8:e83504.
- 424 Cappelli K., Verini-Supplizi A., Capomaccio S., Silvestrelli M., 2007. Analysis of  
425 peripheral blood mononuclear cells gene expression in endurance horses by  
426 cDNA-AFLP technique. *Res Vet Sci*. 82:335-43.
- 427 China National Commission of Animal Genetic Resources., 2011. *Animal Genetic  
428 Resources in China: Horse, Donkeys, Camels*. China Agriculture Press, Beijing,  
429 pp. 28-37.
- 430 Chiusaroli R., Knobler H., Luxenburg C., Sanjay A., Granot-Attas S., Tiran Z.,  
431 Miyazaki T., Harmelin A., Baron R., Elson A., 2004. Tyrosine phosphatase  
432 epsilon is a positive regulator of osteoclast function in vitro and in vivo. *Mol  
433 Biol Cell*. 15:234-44.
- 434 Conquet F., Bashir Z., Davies C.H., Daniel H., Ferraguti F., Bordi F., Franz-Bacon K.,  
435 Reggiani A., Matarese V., Condé F., Collingridge G.L., Crépel F., 1994. Motor  
436 deficit and impairment of synaptic plasticity in mice lacking mGluR1. *Nature*.  
437 372:237-43.
- 438 Dalbo V.J., Roberts M.D., Hassell S., Kerksick C.M. 2013. Effects of pre-exercise  
439 feeding on serum hormone concentrations and biomarkers of myostatin and  
440 ubiquitin proteasome pathway activity. *Eur J Nutr*. 52:477-87.
- 441 Davis M., 2010. *When Things Get Dark: A Mongolian Winter's Tale*. St. Martin's  
442 Press, NY, pp. 169.

- 443 DeLise A.M., Fischer L., Tuan R.S., 2000. C Cellular interactions and signaling in  
444 cartilage development. *Osteoarthritis Cartilage*. 8:309-34.
- 445 Do K.T., Cho H.W., Badrinath N., Park J.W., Choi J.Y., Chung Y.H., Lee H.K., Song  
446 K.D., Cho B.W., 2015. Molecular Characterization and Expression Analysis of  
447 Creatine Kinase Muscle (*CK-M*) Gene in Horse. *Asian-Australas J Anim Sci*.  
448 28:1680-5.
- 449 Doan R., Cohen N.D., Sawyer J., Ghaffari N., Johnson C.D., Dindot S.V., 2012.  
450 Whole-genome sequencing and genetic variant analysis of a Quarter Horse mare.  
451 *BMC Genomics*. 13:78.
- 452 Dugarjaviin M., 2009. *Horse in China*. Hong Kong Cultural/China Horstry Publishing  
453 CO., Ltd, HK.
- 454 Elisabeth Y., 2011. *The Mongolian Horse and Horseman*. In: SIT Graduate  
455 Institute/SIT Study Abroad, SIT Digital Collections.  
456 [http://digitalcollections.sit.edu/cgi/viewcontent.cgi?article=2074&context=isp\\_c](http://digitalcollections.sit.edu/cgi/viewcontent.cgi?article=2074&context=isp_collection)  
457 [ollection](http://digitalcollections.sit.edu/cgi/viewcontent.cgi?article=2074&context=isp_collection). Accessed 11 Jan 2018.
- 458 Franzini-Armstrong C., 1973. The structure of a simple Z line. *J Cell Biol*. 58:630-42.
- 459 Gabriel B.M., Hamilton D.L., Tremblay A.M., Wackerhage H., 2016. The Hippo  
460 signal transduction network for exercise physiologists. *J Appl Physiol*. (1985)  
461 120:1105-17.
- 462 Gim J.A., Ayarpadikannan S., Eo J., Kwon Y.J., Choi Y., Lee H.K., Park K.D., Yang  
463 Y.M., Cho B.W., Kim H.S., 2014. Transcriptional expression changes of glucose  
464 metabolism genes after exercise in thoroughbred horses. *Gene*. 547: 152-8.

- 465 Giordano Attianese G.M., Desvergne B., 2015. Integrative and systemic approaches  
466 for evaluating PPAR $\beta/\delta$  (PPARD) function. *Nucl Recept Signal*. 13:e001.
- 467 Gradi A., Imataka H., Svitkin Y.V., Rom E., Raught B., Morino S., Sonenberg N.,  
468 1998. A novel functional human eukaryotic translation initiation factor 4G. *Mol*  
469 *Cell Biol*. 18:334-42.
- 470 Hill E.W., Gu J., McGivney B.A., MacHugh D.E., 2010. Targets of selection in the  
471 Thoroughbred genome contain exercise-relevant gene SNPs associated with elite  
472 racecourse performance. *Anim Genet* 41 Suppl. 2:56-63.
- 473 Hou N., Yang Y., Scott I.C., Lou X., 2017. The Sec domain protein Scfd1 facilitates  
474 trafficking of ECM components during chondrogenesis. *Dev Biol*. 421:8-15.
- 475 Hund A. 2008. The Stallion's Mane The Next Generation of Horses in Mongolia.  
476 *Parasite Immunology*. 20:73-80.
- 477 Inoue M., Saeki M., Egusa H., Niwa H., Kamisaki Y., 2010. PIH1D1, a subunit of  
478 R2TP complex, inhibits doxorubicin-induced apoptosis. *Biochem Biophys Res*  
479 *Commun*. 403:340-4.
- 480 Jespersen T., Grunnet M., Olesen S.P., 2005. The KCNQ1 Potassium Channel: From  
481 Gene to Physiological Function. *Physiology (Bethesda)*. 20:408-16.
- 482 Kamm J.L., Frisbie D.D., McIlwraith C.W., Orr K.E., 2013. Gene biomarkers in  
483 peripheral white blood cells of horses with experimentally induced osteoarthritis.  
484 *Am J Vet Res*. 74:115-21.
- 485 Kramer H.F., Goodyear L.J., 2007. Exercise, MAPK, and NF-kappaB signaling in  
486 skeletal muscle. *J Appl Physiol (1985)*. 103:388-95.



- 487 Kulikova M.A., Maliuchenko N.V., Timofeeva M.A., Shleptsova V.A., Tschegol'kova  
488 IuA., VEDIakov A.M., Tonevitskiĭ A.G., 2007. Polymorphisms of the main genes  
489 of neurotransmitter systems: I. the dopaminergic system. *Fiziol Cheloveka*.  
490 33:105-12.
- 491 Langlois S., Cowan K.N., 2017. Regulation of Skeletal Muscle Myoblast  
492 Differentiation and Proliferation by Pannexins. *Adv Exp Med Biol*. 925:57-73.
- 493 Launay J.M., Hervé P., Peoc'h K., Tournois C., Callebert J., Nebigil C.G., Etienne N.,  
494 Drouet L., Humbert M., Simonneau G., Maroteaux L., 2002. Function of the  
495 serotonin 5-hydroxytryptamine 2B receptor in pulmonary hypertension. *Nat Med*.  
496 8:1129-35.
- 497 Li H., 2011. A statistical framework for SNP calling, mutation discovery, association  
498 mapping and population genetical parameter estimation from sequencing data.  
499 *Bioinformatics*. 27:2987-93.
- 500 Li H., 2013. Aligning sequence reads, clone sequences and assembly contigs with  
501 BWA-MEM. <https://arxiv.org/abs/1303.3997>. Accessed 26 Dec 2016.
- 502 Li L.F., Guan W.J., Hua Y., Bai X.J., Ma Y.H., 2009. Establishment and  
503 characterization of a fibroblast cell line from the Mongolian horse. *In Vitro Cell*  
504 *Dev Biol Anim*. 45:311-6.
- 505 Lippi G., Longo UG., Maffulli N., 2010, Genetics and sports. *Br Med Bull*, 93:27-47,
- 506 Liu S.D., Zhang Y.Q., Cao J., 2016. The influence of the aerobic endurance training  
507 on the skeletal muscular mitochondria function and PI3K-Akt protein expression.  
508 *Zhongguo Ying Yong Sheng Li Xue Za Zhi*. 32:55-8.

- 509 Luo J., McMullen J.R., Sobkiw C.L., Zhang L., Dorfman A.L., Sherwood M.C.,  
510 Logsdon M.N., Horner J.W., DePinho R.A., Izumo S., Cantley L.C., 2005. Class  
511 I<sub>A</sub> Phosphoinositide 3-Kinase Regulates Heart Size and Physiological Cardiac  
512 Hypertrophy. *Mol Cell Biol.* 25:9491-502.
- 513 McGivney B.A., McGettigan P.A., Browne J.A., Evans A.C., Fonseca R.G., Loftus  
514 B.J., Lohan A., MacHugh D.E., Murphy B.A., Katz L.M., Hill E.W., 2010.  
515 Characterization of the equine skeletal muscle transcriptome identifies novel  
516 functional responses to exercise training. *BMC Genomics.* 11:398.
- 517 McKenna A., Hanna M., Banks E., Sivachenko A., Cibulskis K., Kernytzky A.,  
518 Garimella K., Altshuler D., Gabriel S., Daly M., DePristo M.A., 2010. The  
519 Genome Analysis Toolkit: a MapReduce framework for analyzing  
520 next-generation DNA sequencing data. *Genome Res.* 20:1297-303.
- 521 Medina-Gomez C., Kemp J.P., Dimou N.L., Kreiner E., Chesi A., Zemel B.S.,  
522 Bønnelykke K., Boer C.G., Ahluwalia T.S., Bisgaard H., Evangelou E., Heppe  
523 D.H.M., Bonewald L.F., Gorski J.P., Ghanbari M., Demissie S., Duque G.,  
524 Maurano M.T., Kiel D.P., Hsu Y.H., C. J. van der Eerden B., Ackert-Bicknell C.,  
525 Reppe S., Gautvik K.M., Raastad T., Karasik D., van de Peppel J., Jaddoe V.W.V.,  
526 Uitterlinden A.G., Tobias J.H., Grant S.F.A., Bagos P.G., Evans D.M.,  
527 Rivadeneira F., 2017. Bivariate genome-wide association meta-analysis of  
528 pediatric musculoskeletal traits reveals pleiotropic effects at the  
529 *SREBF1/TOMIL2* locus. *Nat Commun.* 8:121.
- 530 Meira C.T., Curi R.A., Farah M.M., de Oliveira H.N., Béltran N.A., Silva J.A. 2nd.,

- 531 2014. Prospection of genomic regions divergently selected in racing line of  
532 Quarter Horses in relation to cutting line. *Animal*. 8:1754-64.
- 533 Meyer S.U., Krebs S., Thirion C., Blum H., Krause S., Pfaffl M.W., 2015. Tumor  
534 Necrosis Factor Alpha and Insulin-Like Growth Factor 1 Induced Modifications  
535 of the Gene Expression Kinetics of Differentiating Skeletal Muscle Cells. *PLoS*  
536 *One*. 10:e0139520.
- 537 Momozawa Y., Takeuchi Y., Kusunose R., Kikusui T., Mori Y., 2005. Association  
538 between equine temperament and polymorphisms in dopamine D4 receptor gene.  
539 *Mamm Genome*. 16:538-44.
- 540 Morabito C., Lanuti P., Caprara G.A., Guarnieri S., Verratti V., Ricci G., Catizone A.,  
541 Marchisio M., Fanò-Illic G., Marigliò M.A., 2016. Responses of peripheral  
542 blood mononuclear cells to moderate exercise and hypoxia. *Scand J Med Sci*  
543 *Sports*. 26:1188-99.
- 544 Park K.D., Park J., Ko J., Kim B.C., Kim H.S., Ahn K., Do K.T., Choi H., Kim H.M.,  
545 Song S., Lee S., Jho S., Kong H.S., Yang Y.M., Jhun B.H., Kim C., Kim T.H.,  
546 Hwang S., Bhak J., Lee H.K., Cho B.W., 2012. Whole transcriptome analyses of  
547 six thoroughbred horses before and after exercise using RNA-Seq. *BMC*  
548 *Genomics*. 13:473.
- 549 Pedersen P.J., Thomsen K.B., Flak J.B., Tejada M.A., Hauser F., Trachsel D., Buhl R.,  
550 Kalbfleisch T., DePriest M.S., MacLeod J.N., Calloe K., Klaerke D.A., 2017.  
551 Molecular cloning and functional expression of the K<sup>+</sup> channel Kv7.1 and the  
552 regulatory subunit KCNE1 from equine myocardium. *Res Vet Sci*. 113:79-86.

- 553 Ponsuksili S., Murani E., Trakooljul N., Schwerin M., Wimmers K., 2014. Discovery  
554 of candidate genes for muscle traits based on GWAS supported by  
555 eQTL-analysis. *Int J Biol Sci.* 10:327-37.
- 556 Ropka-Molik K., Stefaniuk-Szmukier M., Z Ukowski K., Piórkowska K.,  
557 Bugno-Poniewierska M., 2017. Exercise-induced modification of the skeletal  
558 muscle transcriptome in Arabian horses. *Physiol Genomics.* 49:318-326.
- 559 Sagara S., Osanai T., Itoh T., Izumiyama K., Shibutani S., Hanada K., Yokoyama H.,  
560 Yamamoto Y., Yokota T., Tomita H., Magota K., Okumura K., 2012.  
561 Overexpression of coupling factor 6 attenuates exercise-induced physiological  
562 cardiac hypertrophy by inhibiting PI3K/Akt signaling in mice. *J Hypertens.*  
563 30:778-86.
- 564 Sauter L., Krudewig A., Herwig L., Ehrenfeuchter N., Lenard A., Affolter M.,  
565 Belting H.G., 2014. Cdh5/VE-cadherin promotes endothelial cell interface  
566 elongation via cortical actin polymerization during angiogenic sprouting. *Cell*  
567 *Rep.* 9:504-13.
- 568 Schröder W., Klostermann A., Distl O., 2011. Candidate genes for physical  
569 performance in the horse. *Vet J.* 190:39-48.
- 570 Shioi T., McMullen J.R., Kang P.M., Douglas P.S., Obata T., Franke T.F., Cantley L.C.,  
571 Izumo S., 2002. Akt/protein kinase B promotes organ growth in transgenic mice.  
572 *Mol Cell Biol.* 22:2799-809.
- 573 Song H.K., Kim J., Lee J.S., Nho K.J., Jeong H.C., Kim J., Ahn Y., Park W.J., Kim  
574 D.H., 2015. Pik3ip1 modulates cardiac hypertrophy by inhibiting PI3K pathway.

- 575 PLoS One. 10:e0122251.
- 576 Song R., Gu J., Liu X., Zhu J., Wang Q., Gao Q., Zhang J., Cheng L., Tong X., Qi X.,  
577 Yuan Y., Liu Z., 2014. Inhibition of osteoclast bone resorption activity through  
578 osteoprotegerin-induced damage of the sealing zone. *Int J Mol Med.* 34:856-62.
- 579 Standard J., Jiang Y., Yu M., Su X., Zhao Z., Xu J., Chen J., King B., Lu L., Tomich J.,  
580 Baybutt R., Wang W., 2014. Reduced signaling of PI3K-Akt and RAS-MAPK  
581 pathways are the key targets for weight loss-induced cancer prevention by  
582 dietary calorie restriction and/or physical activity. *J Nutr Biochem.* 25:  
583 1317–1323.
- 584 Testi R., Phillips J.H., Lanier L.L., 1989. Leu 23 induction as an early marker of  
585 functional CD3/T cell antigen receptor triggering. Requirement for receptor  
586 cross-linking, prolonged elevation of intracellular [Ca<sup>++</sup>] and stimulation of  
587 protein kinase C. *J Immunol.* 142:1854-60.
- 588 Tranquille C.A., Blunden A.S., Dyson S.J., Parkin T.D., Goodship A.E., Murray R.C.,  
589 2009. Effect of exercise on thicknesses of mature hyaline cartilage, calcified  
590 cartilage, and subchondral bone of equine tarsi. *Am J Vet Res.* 70:1477-83.
- 591 van de Lest C.H., Brama P.A., Van Weeren P.R., 2002. The influence of exercise on  
592 the composition of developing equine joints. *Biorheology.* 39:183-91.
- 593 Vega R.B., Konhilas J.P., Kelly D.P., Leinwand L.A., 2017. Molecular Mechanisms  
594 Underlying Cardiac Adaptation to Exercise. *Cell Metab.* 25:1012-1026.
- 595 Wang K., Li M., Hakonarson H., 2010. ANNOVAR: functional annotation of genetic  
596 variants from high-throughput sequencing data. *Nucleic Acids Res.* 38:e164.

- 597 Xie C., Mao X., Huang J., Ding Y., Wu J., Dong S., Kong L., Gao G., Li C.Y., Wei L.,  
598 2011. KOBAS 2.0: a web server for annotation and identification of enriched  
599 pathways and diseases. *Nucleic Acids Res.* 39:W316-22.
- 600 Xie L., Jiang Y., Ouyang P., Chen J., Doan H., Herndon B., Sylvester J.E., Zhang K.,  
601 Molteni A., Reichle M., Zhang R., Haub M.D., Baybutt R.C., Wang W., 2007.  
602 Effects of dietary calorie restriction or exercise on the PI3K and Ras signaling  
603 pathways in the skin of mice. *J Biol Chem.* 282:28025-35.
- 604 Yi F., Brubaker P.L., Jin T., 2005. TCF-4 Mediates Cell Type-specific Regulation of  
605 Proglucagon Gene Expression by  $\beta$ -Catenin and Glycogen Synthase Kinase-3 $\beta$ . *J*  
606 *Biol Chem.* 280:1457-64.
- 607 Young M.D., Wakefield M.J., Smyth G.K., Oshlack A., 2010. Gene ontology analysis  
608 for RNA-seq: accounting for selection bias. *Genome Biol.* 11:R14.
